# Supplementary material for: Evidence for Regulation of ECM3 Expression by Methylation of Histone H3 Lysine 4 and Intergenic Transcription in Saccharomyces cerevisiae
Source: PubMed Central journal article supplement (PMC5015954; doi:10.1534/g3.116.033118), 2016-07-22
Supplement: supp_g3.116.033118_FigureS3.pdf [file supp_g3.116.033118_FigureS3.pdf]

FIGURE S3

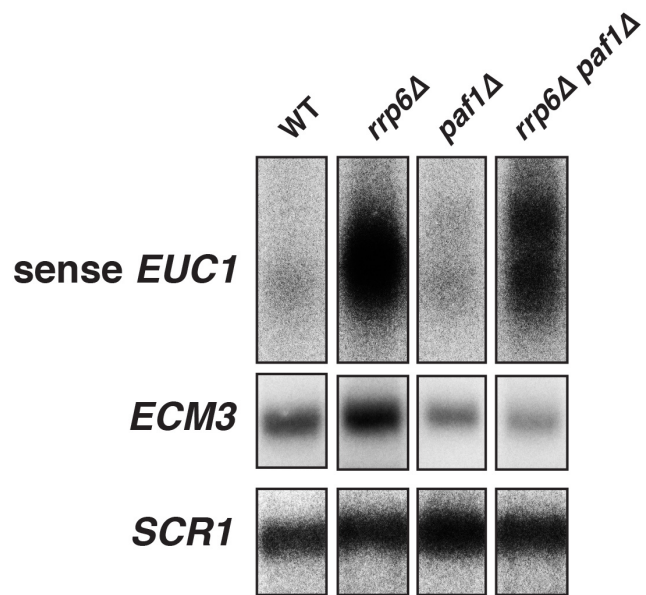

**Figure S3.** The long *EUC1* isoform is an unstable transcript that is transcribed in the sense direction relative to *ECM3*. Representative northern analysis of *EUC1* and *ECM3* levels in a wild-type strain compared to strains where CUTs are stabilized (*rrp6Δ*) or lacking Paf1 (*paf1Δ* and *paf1Δ rrp6Δ*). *EUC1* was detected using a sense strand-specific probe labeled by asymmetric PCR. *SCR1* serves as a loading control.
