# Supplementary material for: Evidence for Regulation of ECM3 Expression by Methylation of Histone H3 Lysine 4 and Intergenic Transcription in Saccharomyces cerevisiae
Source: PubMed Central journal article supplement (PMC5015954; doi:10.1534/g3.116.033118), 2016-07-22
Supplement: supp_g3.116.033118_TableS1.pdf [file supp_g3.116.033118_TableS1.pdf]

**Table S1. *Saccharomyces cerevisiae* strains used in this study.**

| Strain           | Genotype                                                                                                                       | Reference or Source                                     |
|------------------|--------------------------------------------------------------------------------------------------------------------------------|---------------------------------------------------------|
| FY4              | <i>MATa</i>                                                                                                                    | Winston, <i>et al.</i> , 1995                           |
| FY5              | <i>MATα</i>                                                                                                                    | Winston, <i>et al.</i> , 1995                           |
| JDY86            | <i>MATa his3Δ200 leu2Δ0 lys2Δ0 trp1Δ63 ura3Δ0 met15Δ0 can1::MFA1pr-HIS3 hht1-hhf1::NatMX4 hht2-hhf2::[HHTS-HHFS]-URA3</i>      | Dai <i>et al.</i> , 2008                                |
| JDY86 derivative | <i>MATa his3Δ200 leu2Δ0 lys2Δ0 trp1Δ63 ura3Δ0 met15Δ0 can1::MFA1pr-HIS3 hht1-hhf1::NatMX4 hht2-hhf2::[hhhs-K4A-HHFS]-URA3</i>  | Dai <i>et al.</i> , 2008                                |
| JDY86 derivative | <i>MATa his3Δ200 leu2Δ0 lys2Δ0 trp1Δ63 ura3Δ0 met15Δ0 can1::MFA1pr-HIS3 hht1-hhf1::NatMX4 hht2-hhf2::[hhhs-K36A-HHFS]-URA3</i> | Dai <i>et al.</i> , 2008                                |
| JDY86 derivative | <i>MATa his3Δ200 leu2Δ0 lys2Δ0 trp1Δ63 ura3Δ0 met15Δ0 can1::MFA1pr-HIS3 hht1-hhf1::NatMX4 hht2-hhf2::[hhhs-K79A-HHFS]-URA3</i> | Dai <i>et al.</i> , 2008                                |
| KY930            | <i>MATα ura3-52 lys2-128δ rad6Δ0::URA3</i>                                                                                     | M. Braun and K. Arndt, unpublished                      |
| KY1130           | <i>MATα his3Δ200 leu2Δ1 bre1Δ0::KanMX</i>                                                                                      | M. Braun and K. Arndt, unpublished                      |
| KY1700           | <i>MATα paf1Δ0::KanMX</i>                                                                                                      | Crisucci and Arndt, 2011                                |
| KY1701           | <i>MATa leu2Δ0 paf1Δ0::KanMX</i>                                                                                               | Crisucci and Arndt, 2012                                |
| KY1703           | <i>MATa rtf1Δ0::KanMX</i>                                                                                                      | Crisucci and Arndt, 2011                                |
| KY1704           | <i>MATα rtf1Δ0::KanMX</i>                                                                                                      | Crisucci and Arndt, 2011                                |
| KY1705           | <i>MATa ctr9Δ0::KanMX</i>                                                                                                      | Crisucci and Arndt, 2011                                |
| KY1706           | <i>MATα cdc73Δ0::KanMX</i>                                                                                                     | Crisucci and Arndt, 2011                                |
| KY1711           | <i>MATa rad6Δ0::KanMX</i>                                                                                                      | Crisucci and Arndt, 2011                                |
| KY1712           | <i>MATα rad6Δ0::KanMX</i>                                                                                                      | E. Crisucci and K. Arndt, unpublished                   |
| KY1713           | <i>MATα bre1Δ0::KanMX</i>                                                                                                      | Crisucci and Arndt, 2011                                |
| KY1715           | <i>MATa set1Δ0::KanMX</i>                                                                                                      | Crisucci and Arndt, 2011                                |
| KY1716           | <i>MATa set2Δ0::KanMX</i>                                                                                                      | Crisucci and Arndt, 2011                                |
| KY1717           | <i>MATa dot1Δ0::KanMX</i>                                                                                                      | Crisucci and Arndt, 2011                                |
| KY1743           | <i>MATα gcn5Δ0::NatMX</i>                                                                                                      | E. Crisucci and K. Arndt, unpublished                   |
| KY1755           | <i>MATα set1Δ0::KanMX</i>                                                                                                      | Crisucci and Arndt, 2011                                |
| KY1805           | <i>MATα leo1Δ0::KanMX</i>                                                                                                      | Tomson <i>et al.</i> , 2013                             |
| KY1975           | <i>MATa trf4Δ0::NatMX leu2Δ0 ura3Δ0</i>                                                                                        | E. Crisucci and K. Arndt, unpublished                   |
| KY2170           | <i>MATa leu2Δ1 ctr9Δ0::KanMX</i>                                                                                               | E. Crisucci and K. Arndt, Pruneski <i>et al.</i> , 2011 |
| KY2171           | <i>MATa cdc73Δ0::KanMX</i>                                                                                                     | E. Crisucci and K. Arndt, unpublished                   |
| KY2173           | <i>MATa bre1Δ0::KanMX</i>                                                                                                      | E. Crisucci and K. Arndt, unpublished                   |
| KY2377           | <i>MATα rrp6Δ0::kanMX paf1Δ0::kanMX</i>                                                                                        | Tomson <i>et al.</i> , 2013                             |
| KY2720           | <i>MATa leu2Δ0 set1Δ0::KanMX</i>                                                                                               | E. Crisucci and K. Arndt, unpublished                   |

|        |                                                                                                                                           |                                                         |
|--------|-------------------------------------------------------------------------------------------------------------------------------------------|---------------------------------------------------------|
| KY2721 | <i>MATα ura3Δ0 set1Δ0::KanMX</i>                                                                                                          | E. Crisucci and K. Arndt, unpublished                   |
| KY2722 | <i>MATα set1Δ0::KanMX</i>                                                                                                                 | E. Crisucci and K. Arndt, unpublished                   |
| KY2723 | <i>MATα ura3Δ0 set2Δ0::KanMX</i>                                                                                                          | E. Crisucci and K. Arndt, unpublished                   |
| KY2724 | <i>MATα leu2Δ0 set2Δ0::KanMX</i>                                                                                                          | E. Crisucci and K. Arndt, unpublished                   |
| KY2725 | <i>MATα leu2Δ0 dot1Δ0::KanMX</i>                                                                                                          | E. Crisucci and K. Arndt, unpublished                   |
| KY2726 | <i>MATα ura3Δ0 dot1Δ0::KanMX</i>                                                                                                          | E. Crisucci and K. Arndt, unpublished                   |
| KY2727 | <i>MATα rrp6Δ0::kanMX paf1Δ0::kanMX</i>                                                                                                   | E. Crisucci and K. Arndt, unpublished                   |
| KY2728 | <i>MATα rrp6Δ0::kanMX paf1Δ0::kanMX</i>                                                                                                   | E. Crisucci and K. Arndt, unpublished                   |
| KY2729 | <i>MATα rrp6Δ0::kanMX paf1Δ0::kanMX leu2Δ0</i>                                                                                            | E. Crisucci and K. Arndt, unpublished                   |
| KY2782 | <i>MATα leu2Δ0 set3Δ0::NatMX</i>                                                                                                          | E. Crisucci and K. Arndt, unpublished                   |
| KY2783 | <i>MATα leu2Δ0 ura3-52 sas3Δ0::NatMX</i>                                                                                                  | E. Crisucci and K. Arndt, unpublished                   |
| OKA279 | <i>MATα tor1-1 frp1::NAT RPL13A-2XFKBP12::TRP1 his3-11,15 leu2-3,112 ura3 trp1-1 ade2-1 can1-100 GAL psi<sup>+</sup></i>                  | Euroscarf                                               |
| OKA292 | <i>MATα tor1-1 frp1::NAT RPL13A-2XFKBP12::TRP1 his3-11,15 leu2-3,112 ura3 trp1-1 ade2-1 can1-100 GAL psi<sup>+</sup> NRD1-FRB::KanMX6</i> | Shulz <i>et al.</i> , 2013                              |
| YJ744  | <i>MATα rrp6Δ0::KanMX</i>                                                                                                                 | J. Pruneski and J. Martens, Tomson <i>et al.</i> , 2013 |
| YJ746  | <i>MATα rrp6Δ0::KanMX</i>                                                                                                                 | J. Pruneski and J. Martens, Tomson <i>et al.</i> , 2013 |
| YJ760  | <i>MATα ura3Δ0 ctr9Δ0::KanMX</i>                                                                                                          | K. Petrov and J. Martens, unpublished                   |
| YJ761  | <i>MATα ura3Δ0 leo1Δ0::KanMX</i>                                                                                                          | K. Petrov and J. Martens, unpublished                   |
| YJ764  | <i>MATα lys2Δ0 ura3Δ0 his3Δ200 cdc73Δ0::KanMX</i>                                                                                         | K. Petrov and J. Martens, unpublished                   |
| YJ766  | <i>MATα lys2Δ0 ura3Δ0 his3Δ200 leu2Δ0 leo1Δ0::KanMX</i>                                                                                   | K. Petrov and J. Martens, unpublished                   |
| YJ788  | <i>MATα his3Δ200 rtf1Δ0::KanMX</i>                                                                                                        | K. Petrov and J. Martens, unpublished                   |
| YJ807  | <i>MATα his3Δ200 paf1Δ0::KanMX</i>                                                                                                        | K. Petrov and J. Martens, unpublished                   |

|        |                                                                                  |                                       |
|--------|----------------------------------------------------------------------------------|---------------------------------------|
| YJ809  | <i>MATα ura3Δ0 paf1Δ0::KanMX</i>                                                 | K. Petrov and J. Martens, unpublished |
| YJ1125 | <i>MATα ura3Δ0 his3Δ200 leu2Δ0</i>                                               | This study                            |
| YJ1126 | <i>MATα rrp6Δ0::KanMX ura3Δ0 his3Δ200 leu2Δ0</i>                                 | This study                            |
| YJ1127 | <i>MATα rrp6Δ0::KanMX ura3Δ0 his3Δ200 leu2Δ0 ecm3-pEUC1Δ1::HA (-400 to -350)</i> | This study                            |
| YJ1128 | <i>MATα rrp6Δ0::KanMX ura3Δ0 ecm3-pEUC1Δ1::HA (-400 to -350)</i>                 | This study                            |
| YJ1129 | <i>MATα rrp6Δ0::KanMX ura3Δ0 ecm3-pEUC1Δ1::HA (-400 to -350)</i>                 | This study                            |
| YJ1130 | <i>MATα rrp6Δ0::KanMX ura3Δ0 leu2Δ0 ecm3-pEUC1Δ2::HA (-400 to -300)</i>          | This study                            |
| YJ1131 | <i>MATα rrp6Δ0::KanMX ura3Δ0 his3Δ200 ecm3-pEUC1Δ2::HA (-400 to -300)</i>        | This study                            |
| YJ1132 | <i>MATα rrp6Δ0::KanMX ura3Δ0 leu2Δ0 ecm3-pEUC1Δ2::HA (-400 to -300)</i>          | This study                            |
| YJ1133 | <i>MATα ura3Δ0 ecm3-pEUC1Δ2::HA (-400 to -300)</i>                               | This study                            |
| YJ1134 | <i>MATα ecm3-pEUC1Δ2::HA (-400 to -300)</i>                                      | This study                            |
| YJ1135 | <i>MATα leu2Δ0 ecm3-pEUC1Δ2::HA (-400 to -300)</i>                               | This study                            |
| YJ1136 | <i>MATα paf1Δ0::kanMX his3Δ200 ecm3-pEUC1Δ2::HA (-400 to -300)</i>               | This study                            |
| YJ1137 | <i>MATα paf1Δ0::kanMX ura3Δ0 his3Δ200 ecm3-pEUC1Δ2::HA (-400 to -300)</i>        | This study                            |
| YJ1138 | <i>MATα paf1Δ0::kanMX ura3Δ0 his3Δ200 ecm3-pEUC1Δ2::HA (-400 to -300)</i>        | This study                            |
| YJ1139 | <i>MATα rrp6Δ0::kanMX set1Δ0::kanMX his3Δ200</i>                                 | This study                            |
| YJ1140 | <i>MATα rrp6Δ0::kanMX set1Δ0::kanMX</i>                                          | This study                            |
| YJ1141 | <i>MATα rrp6Δ0::kanMX set1Δ0::kanMX his3Δ200</i>                                 | This study                            |
| YJ1142 | <i>MATα rrp6Δ0::kanMX rtf1Δ0::kanMX</i>                                          | This study                            |
| YJ1143 | <i>MATα rrp6Δ0::kanMX rtf1Δ0::kanMX ura3Δ0 his3Δ200</i>                          | This study                            |
| YJ1144 | <i>MATα rrp6Δ0::kanMX rtf1Δ0::kanMX leu2Δ0</i>                                   | This study                            |
| YJ1145 | <i>MATα rrp6Δ0::kanMX set2Δ0::kanMX leu2Δ0</i>                                   | This study                            |
| YJ1146 | <i>MATα rrp6Δ0::kanMX set2Δ0::kanMX</i>                                          | This study                            |
| YJ1147 | <i>MATα rrp6Δ0::kanMX set2Δ0::kanMX leu2Δ0 his3Δ200</i>                          | This study                            |
