# Supplementary material for: Evidence for Regulation of ECM3 Expression by Methylation of Histone H3 Lysine 4 and Intergenic Transcription in Saccharomyces cerevisiae
Source: PubMed Central journal article supplement (PMC5015954; doi:10.1534/g3.116.033118), 2016-07-22
Supplement: supp_g3.116.033118_TableS2.pdf [file supp_g3.116.033118_TableS2.pdf]

Table S2. Oligonucleotides used in this study.

| Purpose                 | Primer set      | Oligo name | Orientation | Location relative to +1 ATG | Sequence                        |
|-------------------------|-----------------|------------|-------------|-----------------------------|---------------------------------|
| ChIP qPCR               | <i>pEUC1</i>    | OJ1172     | F           | -541                        | 5'-CCATGCTTATCTGCCGTCTT         |
|                         |                 | OJ1257     | R           | -381                        | 5'-AGGAAGCTCAACTATCACCG         |
| ChIP qPCR               | <i>5' EUC1</i>  | OJ1730     | F           | -299                        | 5'-CGTACGCTACCATCTGTTACTCTTGC   |
|                         |                 | OJ1731     | R           | -191                        | 5'-CCGGATGCCCTATGATGAAAGTCTATAT |
| ChIP qPCR               | <i>EUC1</i>     | OJ1329     | F           | -186                        | 5'-CTTCTCAGAAGCCTCGCAAT         |
|                         |                 | OJ1173     | R           | -100                        | 5'-GGTAATGGTCAACAATACGC         |
| ChIP qPCR               | <i>pECM3</i>    | OJ1715     | F           | -119                        | 5'-GCGTATTGTTGACCATTACC         |
|                         |                 | OJ1270     | R           | -1                          | 5'-TGTCTACTTGTCTTGAAGTTAC       |
| ChIP qPCR               | <i>5' ECM3</i>  | OJ1732     | F           | +3                          | 5'-ACACACATCACACTGGGACAAG       |
|                         |                 | OJ1733     | R           | +142                        | 5'-CGATATCAGAGATGGACCTTGTG      |
| ChIP qPCR               | mid <i>ECM3</i> | OJ1728     | F           | +838                        | 5'-AGCGAGCTTAACGATCCTACT        |
|                         |                 | OJ1175     | R           | +976                        | 5'-GTAGTTCACGCATATCGATGG        |
| Northern probe template | <i>ARO2 CUT</i> | OJ1160     | F           | -494                        | 5'-CTACGTTGGGCACGTCTAAG         |
|                         |                 | OJ1161     | R           | -49                         | 5'-ATAACGCTTAGATGATGCCGT        |
| Northern probe template | <i>ARO8 CUT</i> | OJ1156     | F           | -429                        | 5'-CATGGCTCATATACACCATCC        |
|                         |                 | OJ1157     | R           | -28                         | 5'-TGTCTGTATCAACTGCAGGG         |
| Northern probe template | <i>CLN3 CUT</i> | OJ1164     | F           | -671                        | 5'-GGAAGTGTGCAACCAAACG          |
|                         |                 | OJ1166     | R           | -321                        | 5'-GGCAGACTCAGTAGTAGAAG         |
| Northern probe template | <i>FET4 CUT</i> | OJ1152     | F           | -497                        | 5'-GCGTAAATCACACAGGTGTTG        |
|                         |                 | OJ1153     | R           | -114                        | 5'-CAATTAATTCATGCCGTGTGAAG      |
| Northern probe template | <i>KNH1 CUT</i> | OJ1168     | F           | -496                        | 5'-TCAGCTGTACAAGCCTAGGC         |
|                         |                 | OJ1169     | R           | -235                        | 5'-CTGTTGGAGTTGGTCAACAAT        |
| Northern probe template | <i>EUC1</i>     | OJ1172     | F           | -541                        | 5'-CCATGCTTATCTGCCGTCTT         |
|                         |                 | OJ1173     | R           | -100                        | 5'-GGTAATGGTCAACAATACGC         |
| Northern probe template | <i>ECM3</i>     | OJ1174     | F           | +545                        | 5'-TGACCAATGATGATTCTGCC         |
|                         |                 | OJ1175     | R           | +976                        | 5'-GTAGTTCACGCATATCGATGG        |
| Northern probe template | <i>SCR1</i>     | OJ459      | F           | -182                        | 5'-CAACTTAGCCAGGACATCCA         |
|                         |                 | OJ460      | R           | +284                        | 5'-AGAGAGACGGATTCTCACG          |

|                              |             |        |   |      |                             |
|------------------------------|-------------|--------|---|------|-----------------------------|
| Northern probe template      | <i>ACT1</i> | OJ257  | F | +277 | 5'-ATCGATTGCTTCATTCTTTTTGTT |
|                              |             | OJ258  | R | +845 | 5'-ATCGATTCTCAAAATGGCGTGAGG |
| <i>EUC1</i> primer extension |             | OJ1258 | R | -180 | 5'-GTAACAGATGGTAGCGTACG     |
| <i>EUC1</i> primer extension |             | OJ1521 | R | -192 | 5'-CGGATGCCCTATGATGAAAGTC   |
| <i>ECM3</i> primer extension |             | OJ1173 | R | -100 | 5'-GGTAATGGTCAACAATACGC     |
| <i>ECM3</i> primer extension |             | OJ1270 | R | -1   | 5'-TGTCTACTTGTCTTGA ACTTAC  |
| <i>ECM3</i> primer extension |             | OJ1362 | R | +1   | 5'-CCCAGTGTGATGTGTGTCAT     |
